# Supplementary material
Source: publisher figshare collection journal article supplement (https://sage.figshare.com/ndownloader/files/15604049)
Supplement: Supplementary file 1 [file 15604049]

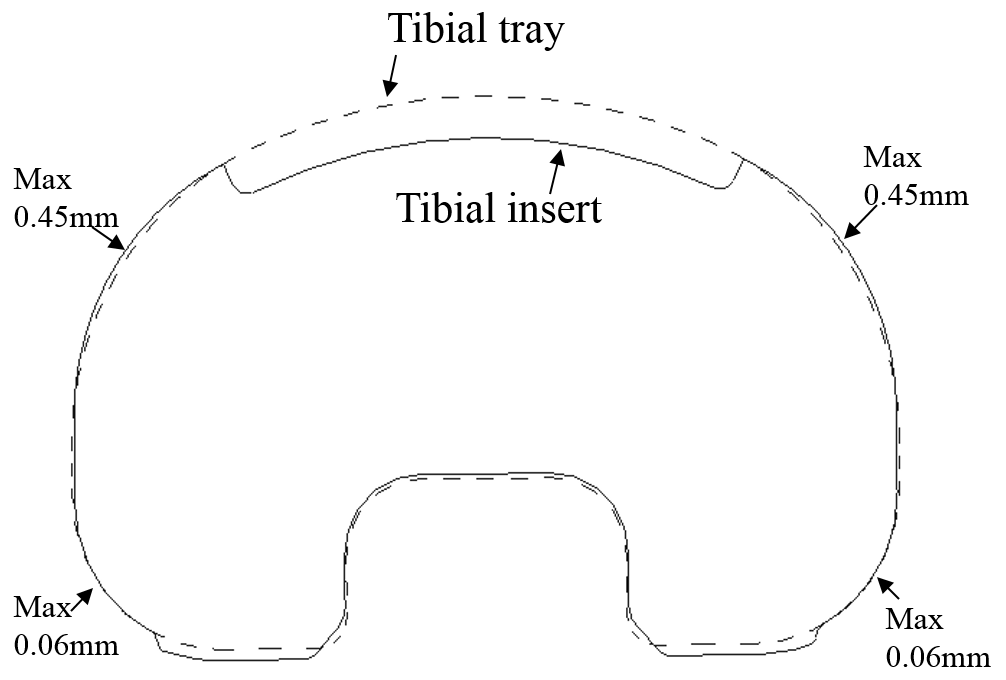


S-Figure 1. Geometric contours of the tibial insert (solid line) and tray (dashed line) at the original position.


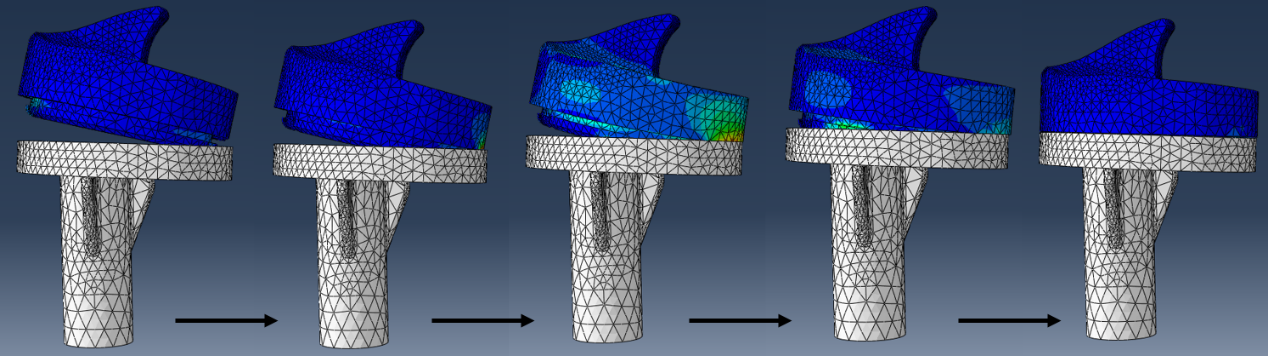


S-Figure 2. Simulation of the interference assembly of tibial insert
